# Supplementary material for: Intracellular flow cytometry staining of antibody-secreting cells using phycoerythrin-conjugated antibodies: pitfalls and solutions
Source: bioRxiv or medRxiv preprint supplement (doi:10.1101/2022.01.10.475671), 2022-01-11
Supplement: Supplementary file [file media-3.pdf]

**Supplementary Table 1: List of antibodies used in this study.**

| <b>Antibody</b>                                                | <b>Source</b>            | <b>Identifier</b>                    |
|----------------------------------------------------------------|--------------------------|--------------------------------------|
| CD19-BUV395<br>(Clone: 1D3)                                    | BD Biosciences           | Cat# 563557;<br>RRID: AB_2722495     |
| CD45R(B220)-PerCP/Cy5.5<br>(Clone: RA3-6B2)                    | BD Biosciences           | Cat# 552771;<br>RRID: AB_394457      |
| CD45R(B220)-BV711<br>(Clone: RA3-6B2)                          | BD Biosciences           | Cat# 563892;<br>RRID: AB_2738470     |
| CD138-BV421<br>(Clone: 281-2)                                  | BD Biosciences           | Cat# 562610;<br>RRID: AB_11153126    |
| IgD-BV605<br>(Clone: 11-26c.2a)                                | BioLegend                | Cat# 405727;<br>RRID: AB_2562887     |
| IgD-APC-H7<br>(Clone: 11-26c.2a)                               | BD Biosciences           | Cat# 565348;<br>RRID: AB_2739201     |
| CD90.2(Thy-1.2)-BV605<br>(Clone: 53-2.1)                       | BD Biosciences           | Cat# 563008;<br>RRID: AB_2665477     |
| CD90.2(Thy-1.2)-APC/Cy7<br>(Clone: 53-2.1)                     | BD Biosciences           | Cat# 561641;<br>RRID: AB_10898013    |
| CD16/32-Unlabeled<br>(Clone: 93)                               | Thermo Fisher Scientific | Cat# 14-0161-86;<br>RRID: AB_467135  |
| Mouse IgG-Unlabeled                                            | SouthernBiotech          | Cat# 0107-01;<br>RRID: AB_2732898    |
| Armenian Hamster IgG-APC<br>Isotype Control (Clone: HTK888)    | BioLegend                | Cat# 400911                          |
| Armenian Hamster IgG-PE<br>Isotype Control (Clone: HTK888)     | BioLegend                | Cat# 400908                          |
| Armenian Hamster IgG-PE/Cy7<br>Isotype Control (Clone: HTK888) | BioLegend                | Cat# 400922                          |
| Rat IgG1-APC Isotype Control<br>(Clone: RTK2071)               | BioLegend                | Cat# 400412                          |
| Rat IgG1-PE Isotype Control<br>(Clone: RTK2071)                | BioLegend                | Cat# 400408                          |
| Rat IgG1-PE/Cy7 Isotype Control<br>(Clone: RTK2071)            | BioLegend                | Cat# 400416                          |
| Rat IgG2a-APC Isotype Control<br>(Clone: RTK2758)              | BioLegend                | Cat# 400512                          |
| Rat IgG2a-PE Isotype Control<br>(Clone: RTK2758)               | BioLegend                | Cat# 400507                          |
| Rat IgG2a-PE/Cy7 Isotype<br>Control (Clone: RTK2758)           | BioLegend                | Cat# 400521                          |
| Rat IgG2b-APC Isotype Control<br>(Clone: RTK4530)              | BioLegend                | Cat# 400612                          |
| Rat IgG2b-PE Isotype Control<br>(Clone: RTK4530)               | BioLegend                | Cat# 400608                          |
| Rat IgG2b-PE/Cy7 Isotype<br>Control (Clone: RTK4530)           | BioLegend                | Cat# 400617                          |
| Pro-IL-1 $\beta$ -PE/Cy7<br>(Clone: NJTEN3)                    | Thermo Fisher Scientific | Cat# 25-7114-82;<br>RRID: AB_2573526 |

|                                                   |                |                                  |
|---------------------------------------------------|----------------|----------------------------------|
| Mouse IgG1-PE Isotype Control<br>(Clone: MOPC-21) | BD Biosciences | Cat# 554680                      |
| CD287(TLR7)-PE<br>(Clone: A94B10)                 | BD Biosciences | Cat# 565557;<br>RRID: AB 2739295 |
